# Supplementary material
Source: Springer Nature journal article supplement (https://www.springermedizin.de/resource/supplementary/12967_2011_762_MOESM2_ESM.pdf/9577454)

**A**

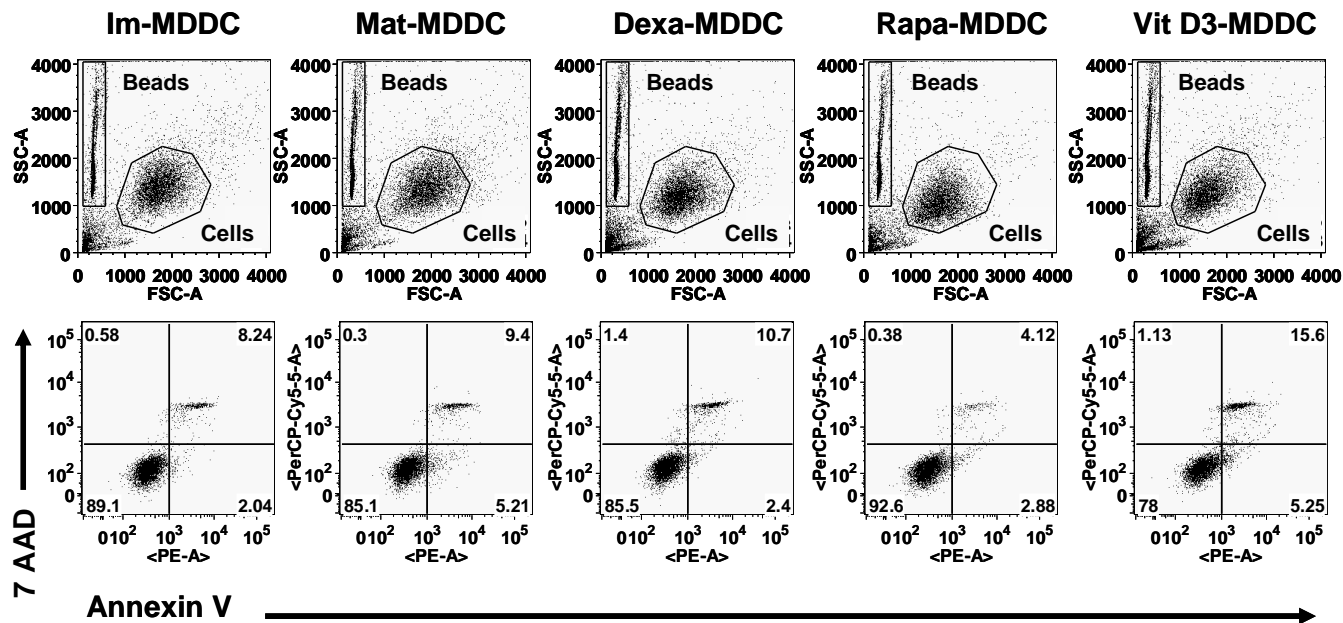

**B**

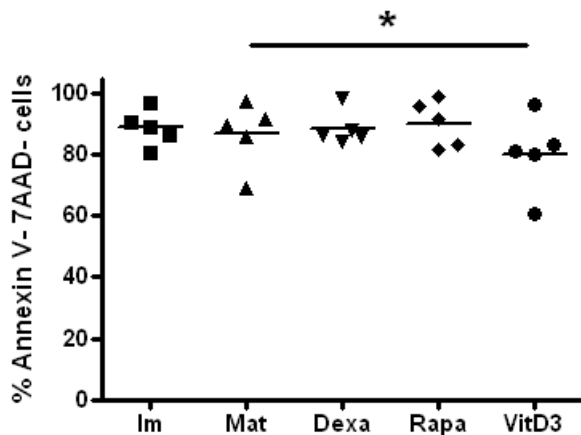

**C**

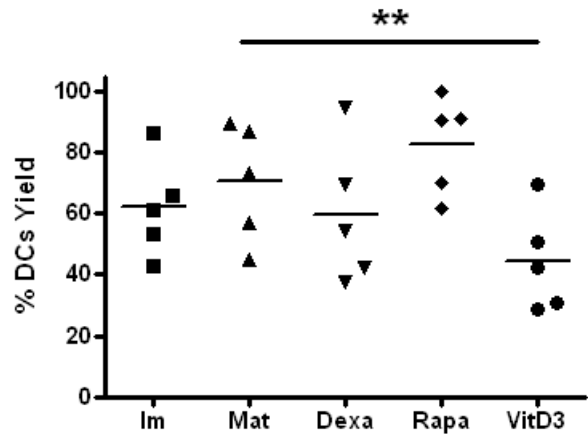

Supplement: MOESM2 [file 9577454]
